# Supplementary figures and images for: Determination of hypochlorite by quenching the fluorescence of 1-pyrenylboronic acid in tap water
Source: Royal Society of Chemistry journal article supplement (doi:10.1039/c5ra23367d), 2015-12-21

## The mass spectra of 1-pyrenylboronic acid – ClO<sup>-</sup> system

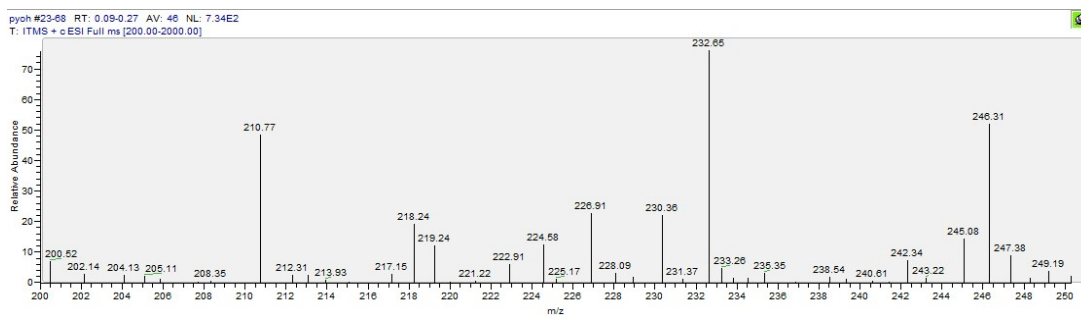

Supplement: c5ra23367d1.pdf [file c5ra23367d1.pdf]
